# Supplementary material for: Wide temperature range (T = 295 K and 770–1305 K) study of the kinetics of the reactions HCO + NO and HCO + NO2 using frequency modulation spectroscopy
Source: Royal Society of Chemistry journal article supplement (doi:10.1039/b704197g), 2007-01-01
Supplement: b704197g.pdf [file b704197g.pdf]

**Wide Temperature Range ( $T = 295\text{ K}$  and  $770\text{-}1305\text{ K}$ ) Study of the Kinetics of the  
Reactions  $\text{HCO} + \text{NO}$  and  $\text{HCO} + \text{NO}_2$  using Frequency Modulation Spectroscopy**

J. Dammeier, M. Colberg, and G. Friedrichs\*

*Institut für Physikalische Chemie, Olshausenstr. 40,  
Christian-Albrechts-Universität zu Kiel, D-24098 Kiel, Germany*

Electronic Supporting Information

---

\*Electronic address: [friedrichs@phc.uni-kiel.de](mailto:friedrichs@phc.uni-kiel.de)

TABLE I: Room temperature experiments for the determination of the rate constant of reaction (1), HCO + NO. Units are ppm, cm, mol, and s.  $p = 51$  mbar,  $T = 295$  K.

| No. | $x_0((\text{CHO})_2)$ | $x_0(\text{NO})$ | $x(\text{HCO})$ | $x(\text{HCO}^*)$ | $x(\text{H})$ | $k_1$                    |
|-----|-----------------------|------------------|-----------------|-------------------|---------------|--------------------------|
| 1   | 5376                  | 0                | 4.8             | 11.2              | 33.6          | -                        |
| 2   | 5364                  | 533              | 4.2             | 9.8               | 29.4          | $(4.5 \times 10^{12})^a$ |
| 3   | 5335                  | 1058             | 4.05            | 9.45              | 28.3          | $8.0 \times 10^{12}$     |
| 4   | 5305                  | 2128             | 3.9             | 9.1               | 27.3          | $8.0 \times 10^{12}$     |
| 5   | 5305                  | 2128             | 3.9             | 9.1               | 27.3          | $8.0 \times 10^{12}$     |
| 6   | 5335                  | 1058             | 3.81            | 8.89              | 26.7          | $8.0 \times 10^{12}$     |
| 7   | 5364                  | 533              | 3.9             | 9.1               | 27.3          | $8.5 \times 10^{12}$     |
| 8   | 5376                  | 0                | 4.05            | 9.45              | 27.0          | -                        |

<sup>a</sup>This measurement, in particular with regard to the result of a second measurement using the same mixture composition (No. 7), was identified as an outlier and was excluded from averaging.

TABLE II: Room temperature experiments for the determination of the rate constant of reaction (2), HCO + NO<sub>2</sub>. Units are ppm, cm, mol, and s.  $p = 50$  mbar,  $T = 295$  K.

| $x_0((\text{CHO})_2)$ | $x_0(\text{NO})$ | $x(\text{HCO})$ | $x(\text{HCO}^*)$ | $x(\text{H})$ | $k_{2a}$              | $k_{2c}$              | $k_{2d}$              | $k_2$                 |
|-----------------------|------------------|-----------------|-------------------|---------------|-----------------------|-----------------------|-----------------------|-----------------------|
| 4989                  | 0                | 1.58            | 3.68              | 12.65         | -                     | -                     | -                     | -                     |
| 5020                  | 259              | 1.86            | 4.34              | 13.64         | $1.23 \times 10^{13}$ | $8.75 \times 10^{12}$ | $1.40 \times 10^{13}$ | $3.51 \times 10^{13}$ |
| 5058                  | 508              | 1.62            | 3.78              | 11.88         | $9.60 \times 10^{12}$ | $8.75 \times 10^{12}$ | $1.10 \times 10^{13}$ | $2.75 \times 10^{13}$ |
| 5041                  | 1024             | 1.35            | 3.15              | 9.9           | $1.05 \times 10^{13}$ | $7.50 \times 10^{12}$ | $1.20 \times 10^{13}$ | $3.00 \times 10^{13}$ |
| 5041                  | 1024             | 1.35            | 3.15              | 9.9           | $1.05 \times 10^{13}$ | $7.50 \times 10^{12}$ | $1.20 \times 10^{13}$ | $3.00 \times 10^{13}$ |
| 5058                  | 508              | 1.28            | 2.98              | 9.35          | $9.45 \times 10^{12}$ | $6.75 \times 10^{12}$ | $1.08 \times 10^{13}$ | $2.70 \times 10^{13}$ |
| 5020                  | 259              | 1.35            | 3.15              | 9.9           | $1.26 \times 10^{13}$ | $9.00 \times 10^{12}$ | $1.44 \times 10^{13}$ | $3.60 \times 10^{13}$ |

TABLE III: Shock tube experiments for the determination of the rate constant of reaction (1), HCO + NO. Units are mbar, K, ppm, cm, mol, and s.

| $p$  | $T$  | $x_0((\text{CHO})_2)$ | $x_0(\text{NO})$ | $x(\text{HCO})$ | $x(\text{H})$ | $k_1$                |
|------|------|-----------------------|------------------|-----------------|---------------|----------------------|
| 1799 | 1173 | 3685                  | 1425             | 60              | 193           | $9.0 \times 10^{12}$ |
| 1058 | 875  | 5375                  | 1575             | 34              | 92            | $7.0 \times 10^{12}$ |
| 1000 | 845  | 5275                  | 1570             | 28              | 70            | $7.0 \times 10^{12}$ |
| 1095 | 886  | 5275                  | 1570             | 32              | 93            | $7.0 \times 10^{12}$ |
| 1031 | 859  | 5275                  | 1570             | 68              | 197           | $5.0 \times 10^{12}$ |
| 1480 | 1053 | 5300                  | 2705             | 68              | 205           | $6.0 \times 10^{12}$ |
| 1285 | 983  | 5300                  | 2705             | 75              | 223           | $5.0 \times 10^{12}$ |
| 1167 | 918  | 5300                  | 2705             | 59              | 173           | $6.5 \times 10^{12}$ |
| 910  | 806  | 5300                  | 2705             | 58              | 165           | $6.0 \times 10^{12}$ |
| 1805 | 1173 | 4595                  | 2445             | 70              | 201           | $1.3 \times 10^{13}$ |
| 1351 | 1128 | 10315                 | 4660             | 150             | 441           | $6.0 \times 10^{12}$ |
| 1427 | 1274 | 8620                  | 4385             | 180             | 559           | $7.5 \times 10^{12}$ |
| 1191 | 1274 | 8680                  | 4400             | 160             | 445           | $1.3 \times 10^{13}$ |
| 1547 | 1041 | 4965                  | 4990             | 45              | 137           | $7.0 \times 10^{12}$ |
| 1505 | 1058 | 4965                  | 4990             | 40              | 120           | $5.0 \times 10^{12}$ |
| 1306 | 983  | 4965                  | 4990             | 100             | 298           | $4.0 \times 10^{12}$ |
| 1135 | 906  | 4965                  | 4990             | 40              | 117           | $7.0 \times 10^{12}$ |
| 1015 | 854  | 4965                  | 4990             | 42              | 121           | $7.0 \times 10^{12}$ |
| 1819 | 1179 | 4505                  | 4880             | 90              | 268           | $6.0 \times 10^{12}$ |
| 1917 | 1182 | 6385                  | 2375             | 190             | 595           | $9.0 \times 10^{12}$ |
| 1246 | 938  | 10560                 | 3010             | 190             | 564           | $6.5 \times 10^{12}$ |
| 1345 | 979  | 10065                 | 2925             | 65              | 194           | $7.5 \times 10^{12}$ |
| 900  | 793  | 10065                 | 2925             | 105             | 298           | $7.0 \times 10^{12}$ |
| 1060 | 861  | 10065                 | 2925             | 150             | 437           | $9.0 \times 10^{12}$ |
| 1436 | 1013 | 10315                 | 5085             | 155             | 467           | $6.8 \times 10^{12}$ |
| 1110 | 883  | 10315                 | 4930             | 80              | 234           | $4.5 \times 10^{12}$ |
| 852  | 769  | 10315                 | 4930             | 83              | 233           | $8.0 \times 10^{12}$ |
| 1130 | 905  | 2525                  | 1230             | 18              | 53            | $6.5 \times 10^{12}$ |
| 1606 | 1078 | 10365                 | 4570             | 160             | 486           | $6.0 \times 10^{12}$ |
| 1755 | 1143 | 7840                  | 4200             | 200             | 601           | $7.0 \times 10^{12}$ |
| 1883 | 1208 | 4085                  | 1420             | 90              | 251           | $8.0 \times 10^{12}$ |
| 1330 | 1220 | 9710                  | 4550             | 180             | 534           | $6.0 \times 10^{12}$ |
| 1426 | 1272 | 8670                  | 4420             | 220             | 674           | $9.0 \times 10^{12}$ |
| 1242 | 1307 | 7980                  | 4375             | 220             | 671           | $1.2 \times 10^{13}$ |
| 1350 | 1248 | 6360                  | 6150             | 190             | 568           | $7.0 \times 10^{12}$ |

TABLE IV: Shock tube experiments for the determination of the rate constant of reaction (2),  $\text{HCO} + \text{NO}_2$ . Units are mbar, K, ppm, cm, mol, and s.

| $p$  | $T$  | $x_0((\text{CHO})_2)$ | $x_0(\text{NO}_2)$ | $x(\text{HCO})$ | $x(\text{H})$ | $k_2$                |
|------|------|-----------------------|--------------------|-----------------|---------------|----------------------|
| 1288 | 971  | 5295                  | 1060               | 53              | 157           | $3.0 \times 10^{13}$ |
| 1227 | 952  | 5290                  | 1060               | 43              | 127           | $3.0 \times 10^{13}$ |
| 1141 | 908  | 5290                  | 1060               | 58              | 170           | $3.5 \times 10^{13}$ |
| 917  | 809  | 5290                  | 1068               | 40              | 114           | $2.5 \times 10^{13}$ |
| 1297 | 1041 | 5010                  | 1047               | 70              | 207           | $3.3 \times 10^{13}$ |
| 1414 | 1183 | 4760                  | 900                | 90              | 228           | $2.0 \times 10^{13}$ |
| 1399 | 1016 | 4995                  | 2440               | 75              | 225           | $3.0 \times 10^{13}$ |
| 1146 | 910  | 4995                  | 2440               | 40              | 117           | $4.0 \times 10^{13}$ |
| 937  | 819  | 4995                  | 2440               | 35              | 38            | $3.0 \times 10^{13}$ |
| 1437 | 1099 | 5995                  | 2965               | 100             | 263           | $4.2 \times 10^{13}$ |
| 1434 | 1186 | 5680                  | 2715               | 120             | 286           | $3.8 \times 10^{13}$ |
| 1266 | 948  | 10220                 | 1350               | 110             | 328           | $4.0 \times 10^{13}$ |
| 1247 | 940  | 10220                 | 1350               | 48              | 143           | $4.0 \times 10^{13}$ |
| 1110 | 884  | 10220                 | 1350               | 70              | 205           | $5.0 \times 10^{13}$ |
| 1137 | 894  | 10220                 | 1350               | 65              | 191           | $4.0 \times 10^{13}$ |
| 1109 | 883  | 10220                 | 1350               | 60              | 176           | $3.0 \times 10^{13}$ |
| 999  | 836  | 10220                 | 1350               | 50              | 144           | $3.0 \times 10^{13}$ |
| 925  | 804  | 10220                 | 1350               | 53              | 151           | $3.0 \times 10^{13}$ |
| 1251 | 1004 | 10435                 | 1075               | 90              | 265           | $2.5 \times 10^{13}$ |

TABLE V: Evaluation of the channel branching ratio  $k_{2a}/k_{2c}$  and the rate constant of reaction (7),  $\text{OH} + (\text{CHO})_2$ . Units are mbar, K, ppm, cm, mol, and s.

| $p$  | $T$  | $x_0((\text{CHO})_2)$ | $x_0(\text{NO}_2)$ | $x(\text{HCO})$ | $x(\text{H})$ | $k(2a)$               | $k(2c)$                  | $k(7)$               |
|------|------|-----------------------|--------------------|-----------------|---------------|-----------------------|--------------------------|----------------------|
| 1287 | 971  | 5295                  | 1060               | 53              | 157           | $2.5 \times 10^{13}$  | (0) <sup>a</sup>         | $1.0 \times 10^{13}$ |
| 1227 | 952  | 5290                  | 1060               | 40              | 118           | $2.9 \times 10^{13}$  | $1.5 \times 10^{12}$     | $1.3 \times 10^{13}$ |
| 1141 | 908  | 5290                  | 1060               | 58              | 170           | $4.0 \times 10^{13}$  | $5.3 \times 10^{12}$     | $1.5 \times 10^{13}$ |
| 917  | 809  | 5290                  | 1068               | 46              | 131           | $1.8 \times 10^{13}$  | $2.0 \times 10^{12}$     | $9.0 \times 10^{12}$ |
| 1251 | 1004 | 10435                 | 1075               | 90              | 265           | $2.5 \times 10^{13}$  | $1.8 \times 10^{12}$     | $1.5 \times 10^{13}$ |
| 1399 | 1016 | 4995                  | 2440               | 72              | 216           | $2.5 \times 10^{13}$  | $4.5 \times 10^{12}$     | $1.2 \times 10^{13}$ |
| 1146 | 910  | 4995                  | 2440               | 43              | 126           | $4.0 \times 10^{13}$  | $8.0 \times 10^{12}$     | $1.6 \times 10^{13}$ |
| 937  | 819  | 4995                  | 2440               | 35              | 38            | $1.8 \times 10^{13}$  | $(4.5 \times 10^{13})^a$ | $8.0 \times 10^{12}$ |
| 1266 | 948  | 10220                 | 1350               | 110             | 328           | $3.0 \times 10^{13}$  | $6.0 \times 10^{12}$     | $1.5 \times 10^{13}$ |
| 1248 | 940  | 10220                 | 1350               | 57              | 170           | $3.0 \times 10^{13}$  | $8.0 \times 10^{12}$     | $8.0 \times 10^{12}$ |
| 1137 | 894  | 10220                 | 1350               | 90              | 265           | $4.0 \times 10^{13}$  | $1.0 \times 10^{13}$     | $7.0 \times 10^{12}$ |
| 1109 | 889  | 10220                 | 1350               | 85              | 294           | $4.8 \times 10^{13}$  | $3.8 \times 10^{12}$     | $8.0 \times 10^{12}$ |
| 999  | 836  | 10220                 | 1350               | 65              | 187           | $3.5 \times 10^{13}$  | $7.5 \times 10^{12}$     | $8.0 \times 10^{12}$ |
| 925  | 804  | 10220                 | 1350               | 60              | 171           | $2.0 \times 10^{13}$  | $6.5 \times 10^{12}$     | $8.0 \times 10^{12}$ |
|      |      |                       |                    |                 | $\emptyset$   | $3.02 \times 10^{13}$ | $5.41 \times 10^{12}$    |                      |

<sup>a</sup>For two measurements, probably due to slight baseline inaccuracies, it was not possible to extract meaningful rate constant values for  $k_{2c}$ . For the sake of completeness, the best fit values are reported but have been excluded from averaging.

TABLE VI: Summary of MP2/6-31G(d) calculation results for estimation of interconversion barrier between O<sub>2</sub>N-CHO and ONO-CHO association complexes (see Figure 6). Cartesian coordinates (10<sup>-10</sup> m), frequencies (cm<sup>-1</sup>), and energies (Hartree).

|                         |                                                                                          |
|-------------------------|------------------------------------------------------------------------------------------|
| O <sub>2</sub> N-CHO    |                                                                                          |
| C                       | -0.853641, -0.576263, -0.000003                                                          |
| O                       | -1.836310, 0.106776, -0.000002                                                           |
| H                       | -0.764244, -1.671233, 0.000033                                                           |
| O                       | 1.470273, -0.785180, -0.000002                                                           |
| N                       | 0.544550, 0.045296, 0.000000                                                             |
| O                       | 0.625317, 1.279872, 0.000003                                                             |
| $\tilde{\nu}_i$         | 111.2, 299.6, 501.4, 550.2, 753.3, 899.2, 989.8, 1328.2, 1349.2, 1824.1, 1843.1, 3143.4  |
| MP2 energy              | -318.1789115                                                                             |
| zero point energy       | 0.0309666                                                                                |
| ONO-CHO                 |                                                                                          |
| C                       | 1.307582, 0.390106, -0.000039                                                            |
| O                       | 1.719961, -0.750790, 0.000007                                                            |
| H                       | 1.949297, 1.286453, 0.000026                                                             |
| O                       | 0.010806, 0.799998, 0.000022                                                             |
| N                       | -0.995017, -0.483589, 0.000016                                                           |
| O                       | -2.084476, -0.079454, -0.000016                                                          |
| $\tilde{\nu}_i$         | 76.3, 211.7, 214.4, 348.5, 564.6, 857.5, 1040.6, 1139.7, 1423.7, 1786.9, 1834.6, 3088.0  |
| MP2 energy              | -318.1986282                                                                             |
| zero point energy       | 0.0286745                                                                                |
| interconversion barrier |                                                                                          |
| C                       | -1.044695, 0.036024, 0.406279                                                            |
| O                       | -1.827773, -0.459225, -0.327823                                                          |
| H                       | -1.083366, 0.382383, 1.434030                                                            |
| O                       | 0.304692, 1.046657, -0.233764                                                            |
| N                       | 0.698546, -0.135439, 0.159022                                                            |
| O                       | 1.830794, -0.543739, -0.061521                                                           |
| $\tilde{\nu}_i$         | -470.8, 198.5, 386.8, 462.7, 643.2, 752.1, 902.6, 1249.1, 1311.3, 1563.2, 1911.2, 3282.8 |
| MP2 energy              | -318.1325476                                                                             |
| zero point energy       | 0.02885                                                                                  |
